# Supplementary material for: Photodegradation of prednisolone under UVB solar irradiation. Role of photogenerated ROS in the degradation mechanism
Source: Royal Society of Chemistry journal article supplement (doi:10.1039/c7pp00200a), 2017-10-10
Supplement: c7pp00200a1.pdf [file c7pp00200a1.pdf]

Supplementary material:

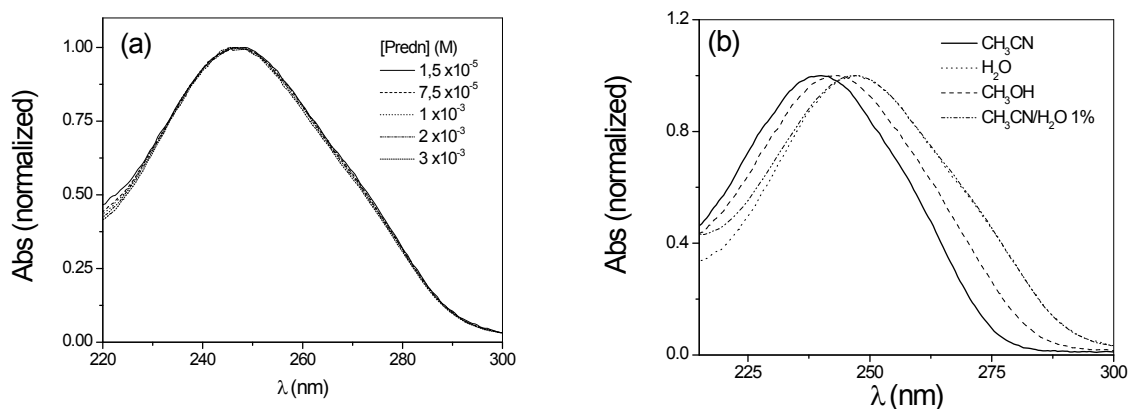

**Figure 1.** (a) Normalized absorption spectra of Predn at different concentration in aqueous solution (water/MeCN 99/1% v/v). (b) Normalized absorption spectra of Predn ( $4 \times 10^{-5}$  M) in different solvents in air-saturated conditions.

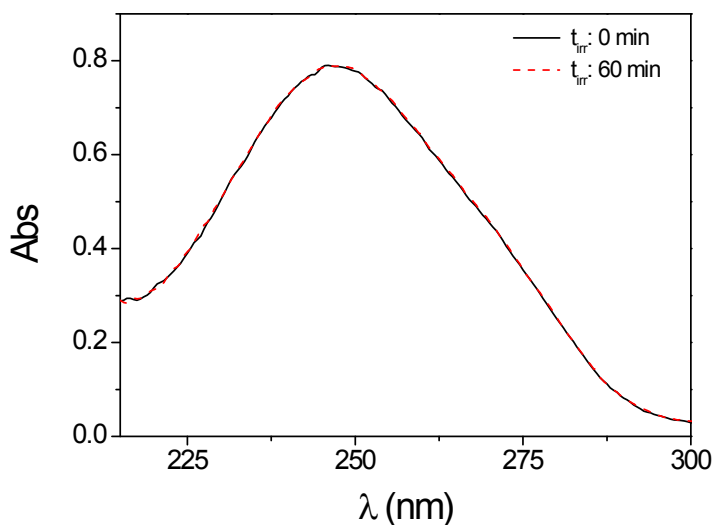

**Figure 2:** Photolysis of Predn ( $4 \times 10^{-5}$  M) in the presence of Rose Bengal in aqueous solution (water/MeCN 99/1% v/v) in air-saturated conditions. Irradiation was carried out with light of wavelength above 400 nm.
